# Supplementary material for: Vaccine protection against rectal acquisition of SIVmac239 in rhesus macaques
Source: PubMed Central journal article supplement (PMC6791558; doi:10.1371/journal.ppat.1008015), 2019-09-30
Supplement: ppat.1008015.s001.pdf [file ppat.1008015.s001.pdf]

A) Vector 1 rDNA

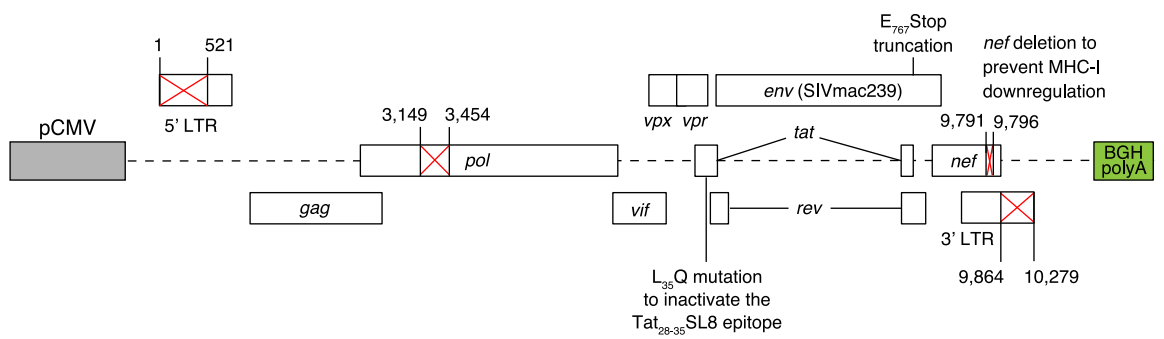

B) Vector 2 rDNA

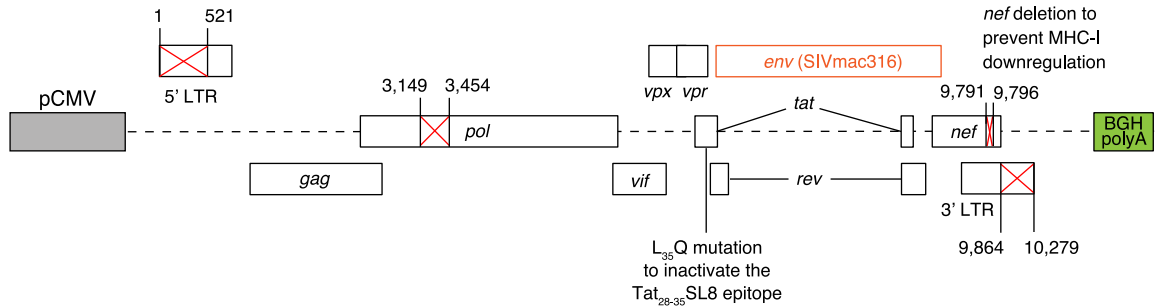

C) Vector 3 rRRV

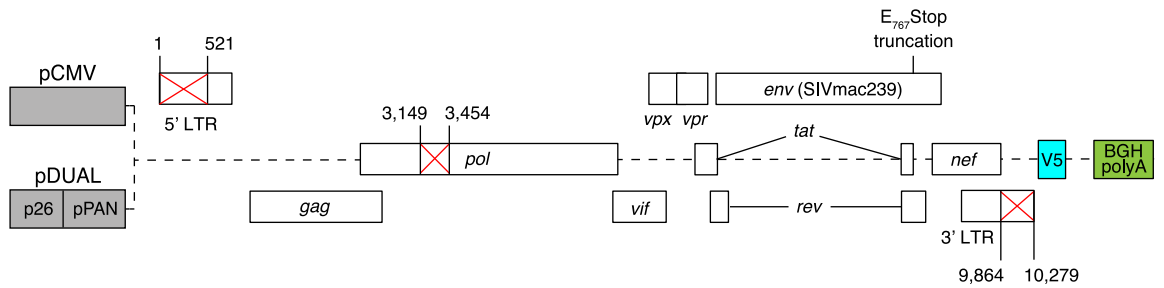

D) Vector 4 rRRV

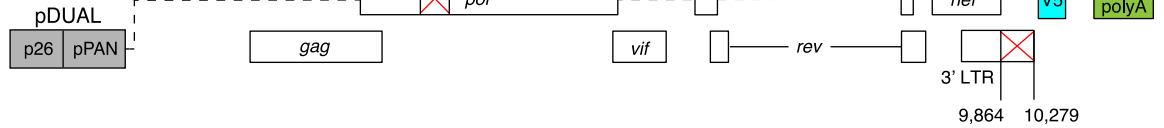

E) Vector 5 rRRV

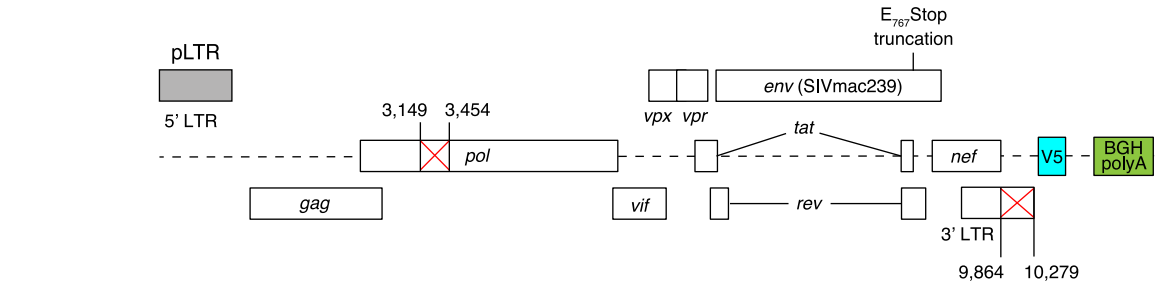

F) Vector 6 rRRV

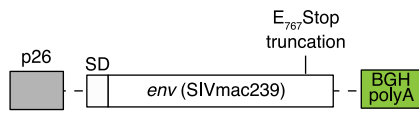

G) Vector 7 rRRV

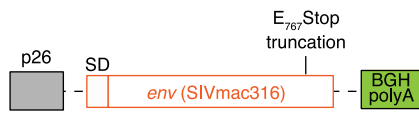

rRRV pentamix
