# Supplementary material for: Vaccine protection against rectal acquisition of SIVmac239 in rhesus macaques
Source: PubMed Central journal article supplement (PMC6791558; doi:10.1371/journal.ppat.1008015), 2019-09-30
Supplement: ppat.1008015.s002.pdf [file ppat.1008015.s002.pdf]

A) Vif<sub>100-109</sub> VL10

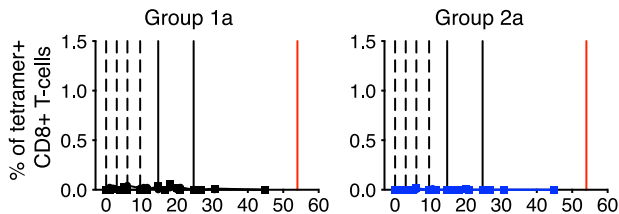

B) Env<sub>620-628</sub> TL9

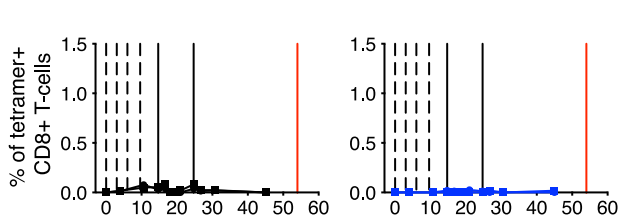

C) Env<sub>233-241</sub> CL9

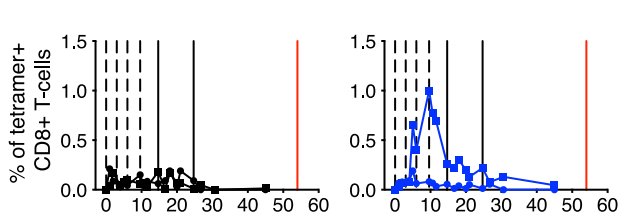

D) Tat<sub>28-35</sub> SL8

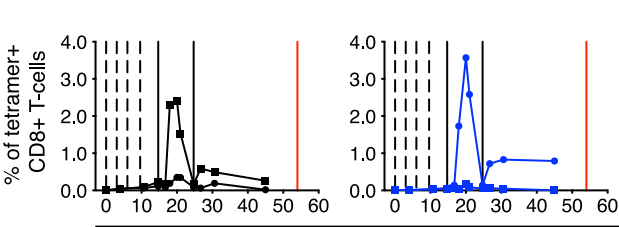

Group 1a

● r14019

■ r14130

Group 2a

● r14129

■ r13053

▮ rDNA-SIVnfl (Group 1a)

▮ or rDNA-SIVnfl+Ipi (Group 2a)

▮ rRRV pentamix

▮ 1<sup>st</sup> SIV challenge

Study week
