# Supplementary material for: Vaccine protection against rectal acquisition of SIVmac239 in rhesus macaques
Source: PubMed Central journal article supplement (PMC6791558; doi:10.1371/journal.ppat.1008015), 2019-09-30

### A) T-cell counts

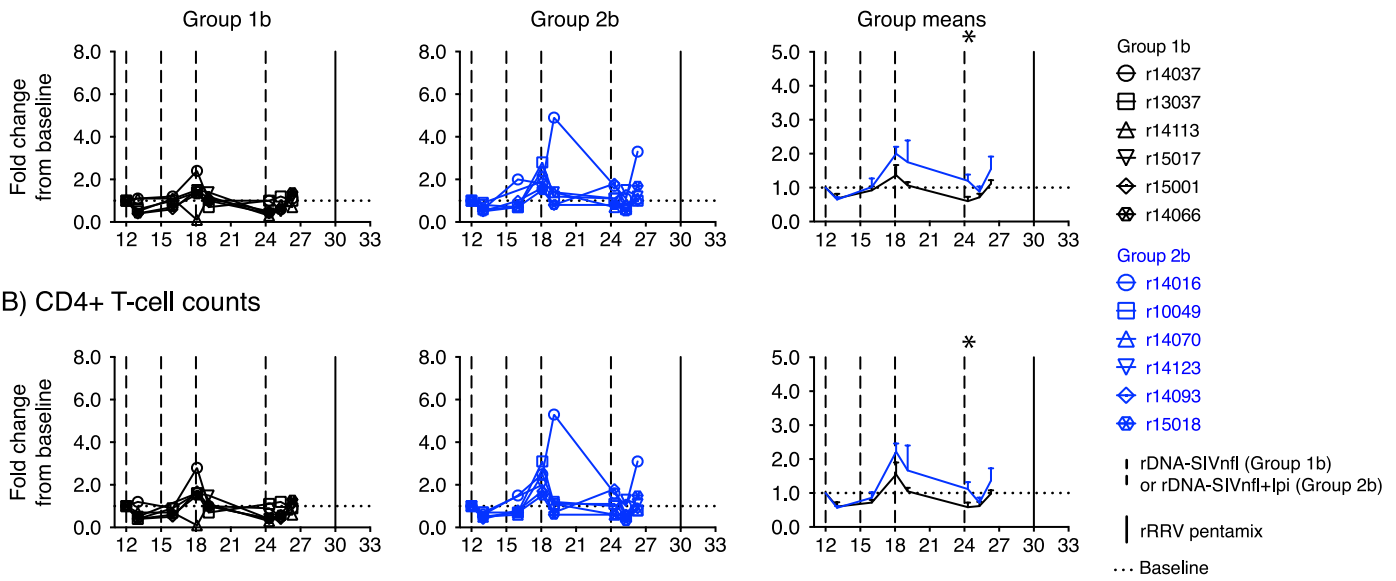

### B) CD4+ T-cell counts

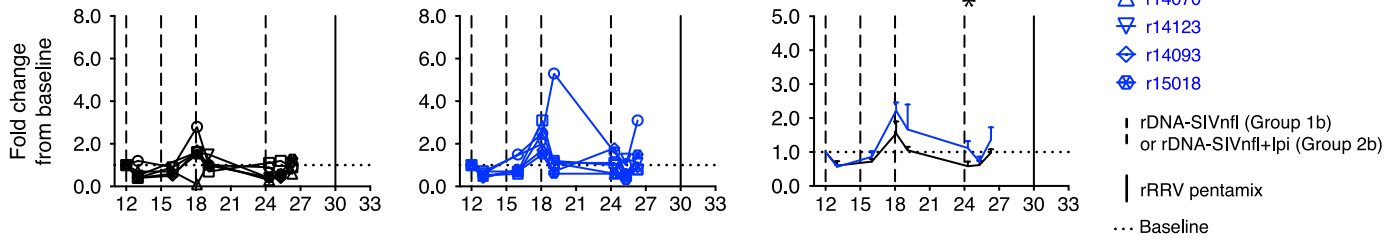

### C) CD8+ T-cell counts

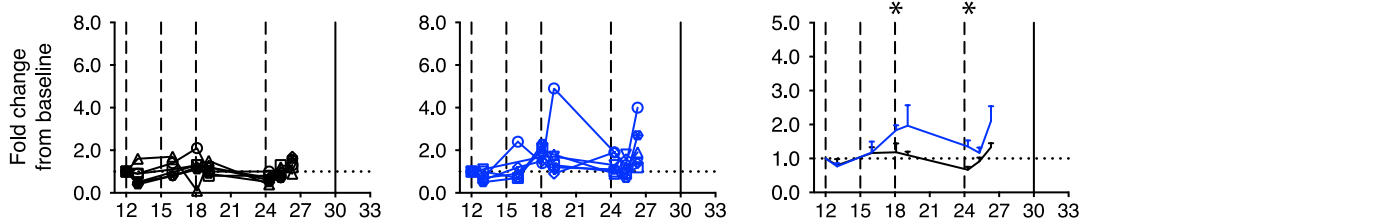

### D) Treg cell counts

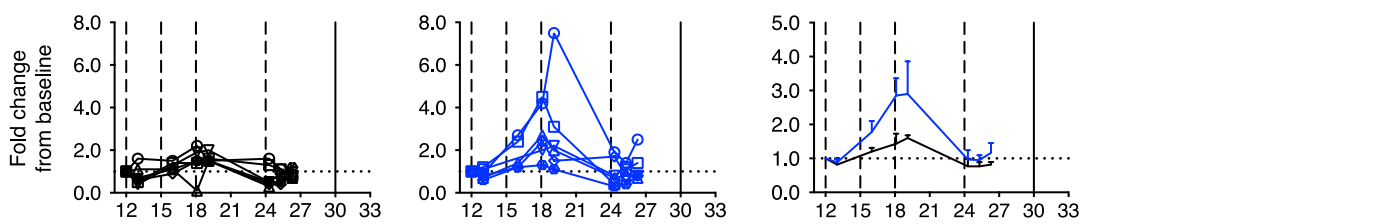

### E) B-cell counts

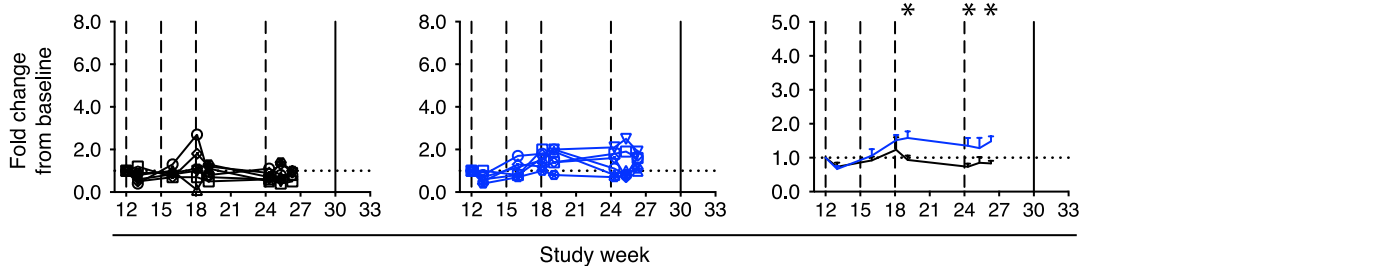

Supplement: ppat.1008015.s003.pdf [file ppat.1008015.s003.pdf]
