# Supplementary material for: Vaccine protection against rectal acquisition of SIVmac239 in rhesus macaques
Source: PubMed Central journal article supplement (PMC6791558; doi:10.1371/journal.ppat.1008015), 2019-09-30

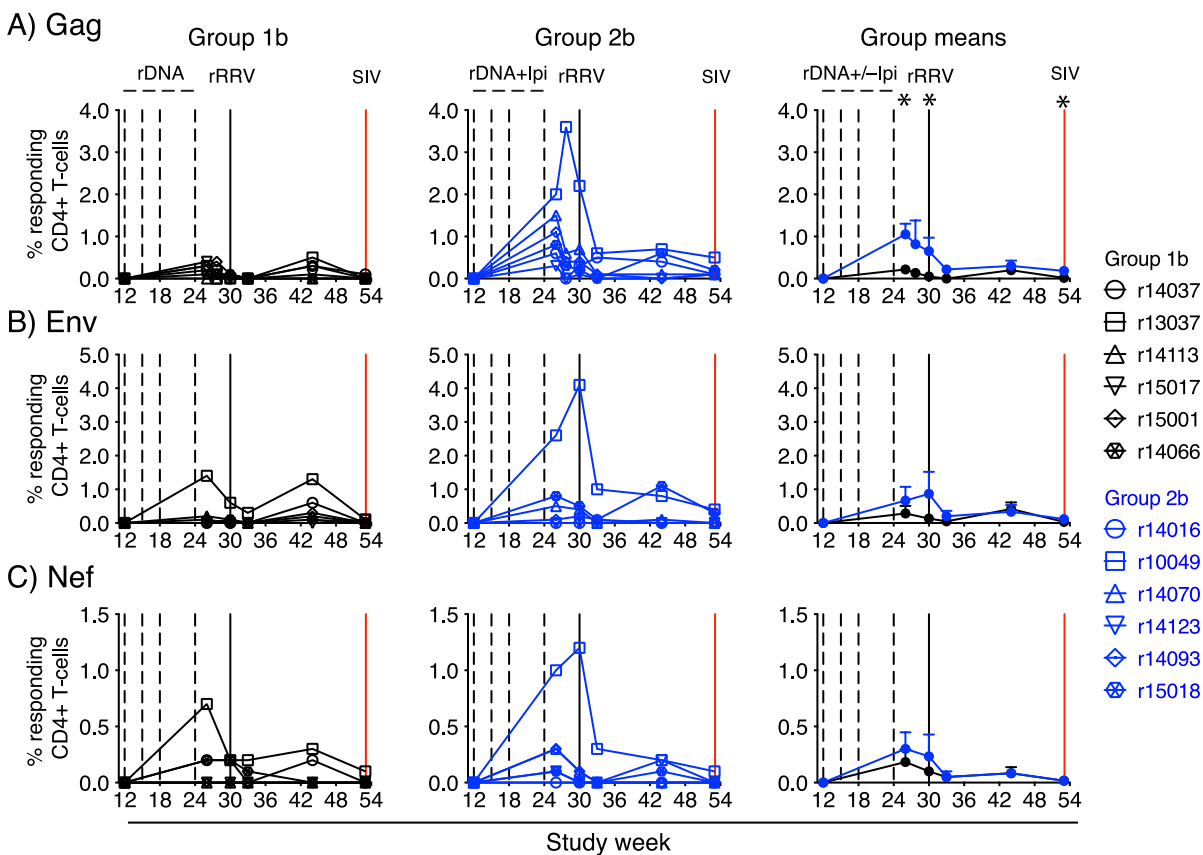

Supplement: ppat.1008015.s004.pdf [file ppat.1008015.s004.pdf]
