# Supplementary material for: Vaccine protection against rectal acquisition of SIVmac239 in rhesus macaques
Source: PubMed Central journal article supplement (PMC6791558; doi:10.1371/journal.ppat.1008015), 2019-09-30

### A) CD8+ T-cell breadth

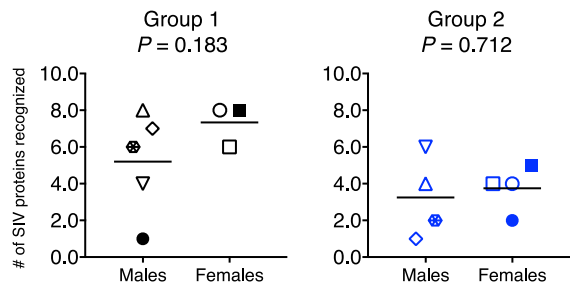

### B) CD8+ T-cell magnitude

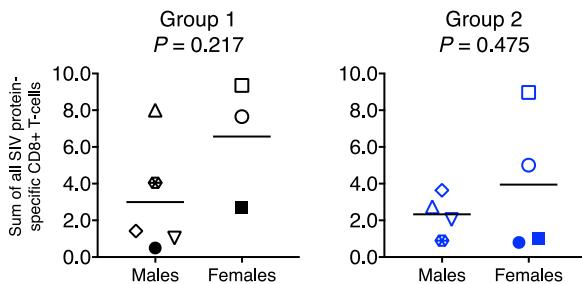

### C) Midpoint titer of gp140-binding Abs

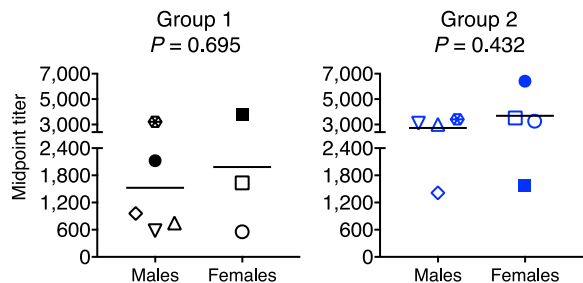

### D) Midpoint titer of gp120-binding Abs

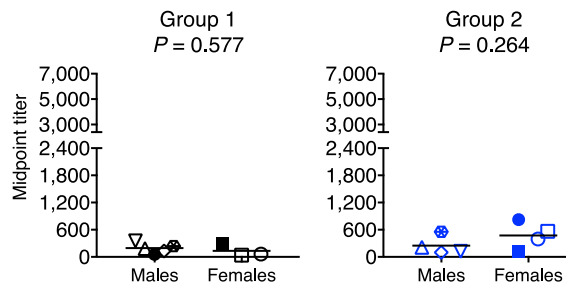

### E) Anti-SIVmac316 nAb titer

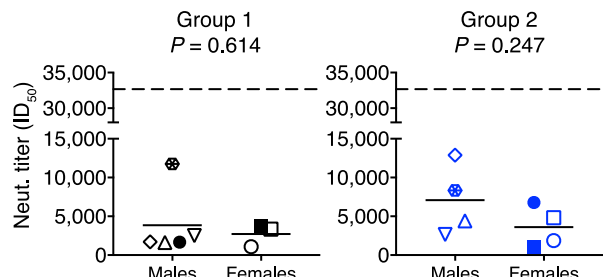

### F) ADCC against SIVmac239-infected cells

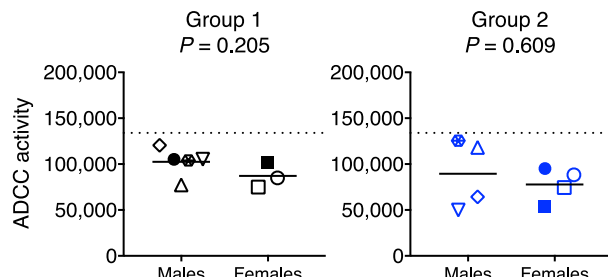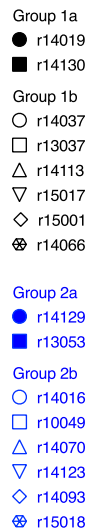

Supplement: ppat.1008015.s006.pdf [file ppat.1008015.s006.pdf]
