# Supplementary material for: Vaccine protection against rectal acquisition of SIVmac239 in rhesus macaques
Source: PubMed Central journal article supplement (PMC6791558; doi:10.1371/journal.ppat.1008015), 2019-09-30
Supplement: ppat.1008015.s008.pdf [file ppat.1008015.s008.pdf]

Ratio of gp140-specific  
IgG/total IgG

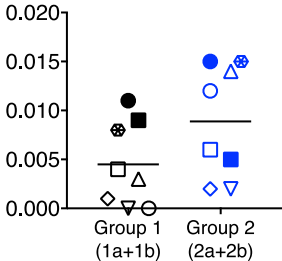

Group 1a

● r14019

■ r14130

Group 1b

○ r14037

□ r13037

△ r14113

▽ r15017

◇ r15001

⊗ r14066

Group 2a

● r14129

■ r13053

Group 2b

○ r14016

□ r10049

△ r14070

▽ r14123

◇ r14093

⊗ r15018
