# Supplementary material for: Vaccine protection against rectal acquisition of SIVmac239 in rhesus macaques
Source: PubMed Central journal article supplement (PMC6791558; doi:10.1371/journal.ppat.1008015), 2019-09-30

A) Total magnitude of vaccine-induced SIV-specific CD8+ T-cell responses

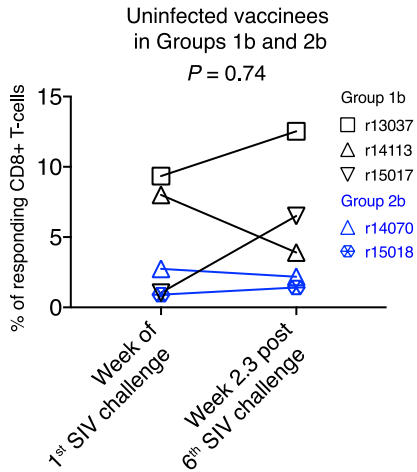

B) Total magnitude of vaccine-induced SIV-specific CD4+ T-cell responses

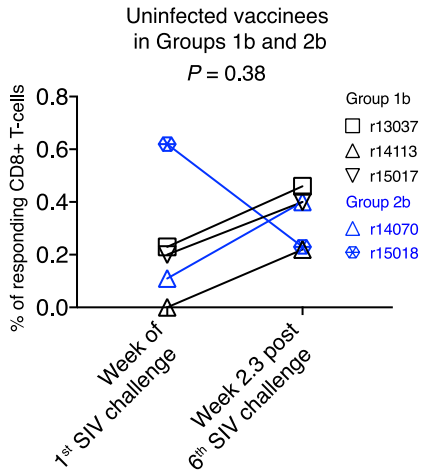

C) Frequency of vaccine-induced Gag<sub>181-189</sub>CM9-specific CD8+ T-cells

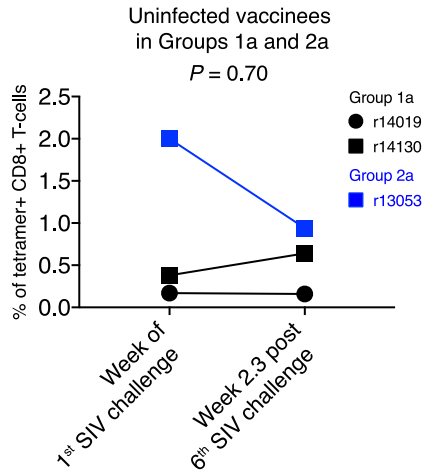

Supplement: ppat.1008015.s009.pdf [file ppat.1008015.s009.pdf]
