# Supplementary material for: Vaccine protection against rectal acquisition of SIVmac239 in rhesus macaques
Source: PubMed Central journal article supplement (PMC6791558; doi:10.1371/journal.ppat.1008015), 2019-09-30
Supplement: ppat.1008015.s010.pdf [file ppat.1008015.s010.pdf]

Exclusion of doublets  
round #1

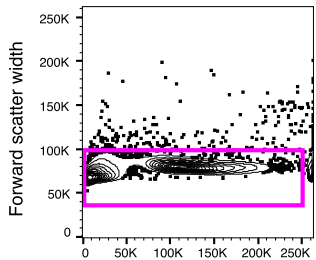

Forward scatter area

Exclusion of doublets  
round #2

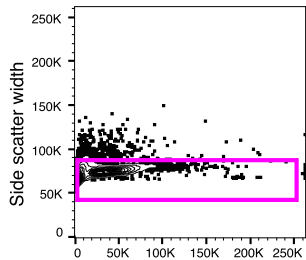

Side scatter area

Time gate

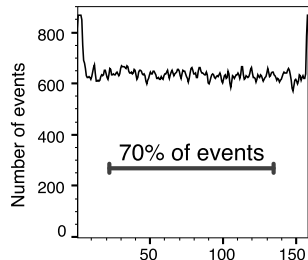

Time (seconds)

Dump channel exclusion;  
Live CD3 gate

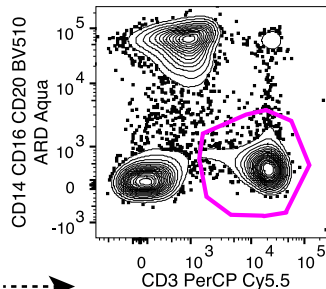

Memory phenotype gate

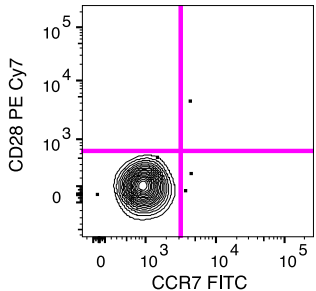

CCR7 FITC

MHC-I tetramer gate

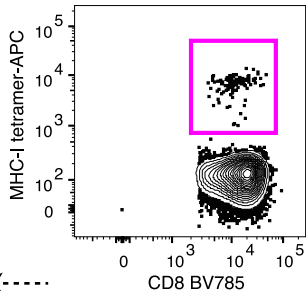

CD8 BV785

CD8 gate

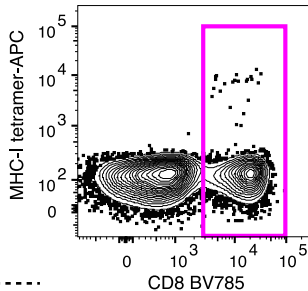

CD8 BV785

Lymphocyte gate

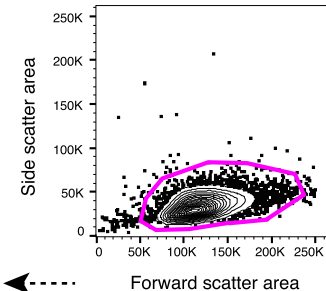

Forward scatter area
