# Supplementary material for: Vaccine protection against rectal acquisition of SIVmac239 in rhesus macaques
Source: PubMed Central journal article supplement (PMC6791558; doi:10.1371/journal.ppat.1008015), 2019-09-30

### Exclusion of doublets round #1

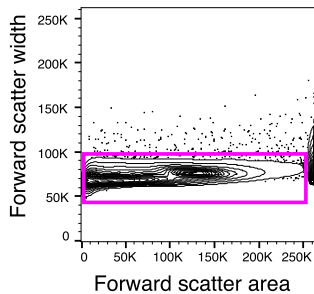

### Exclusion of doublets round #2

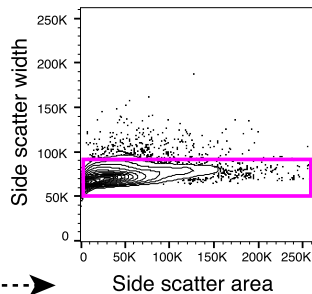

### Time gate

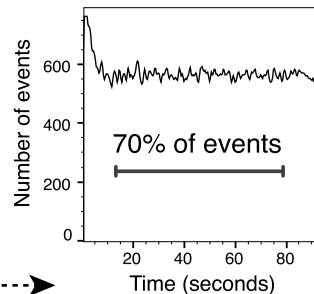

### Delineation of CD4 and CD8 subsets

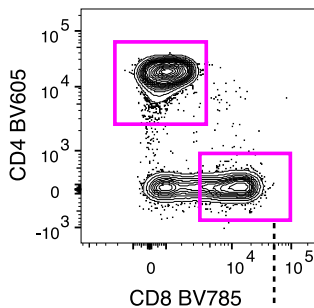

### Lymphocyte gate

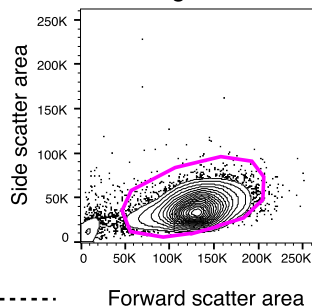

### Dump channel exclusion; Live CD3 gate

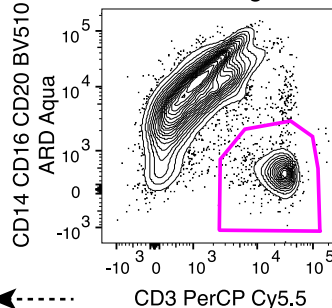

### CD69+IFN- $\gamma$ + cells

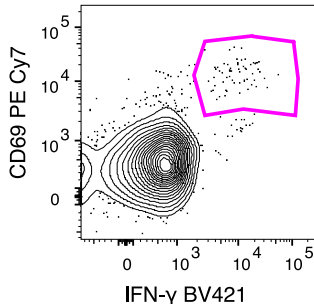

### CD69+TNF- $\alpha$ + cells

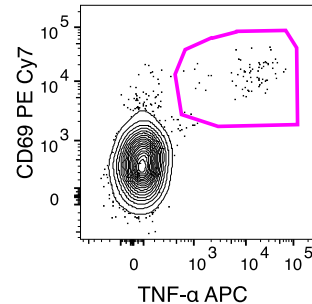

### CD69+CD107a+ cells

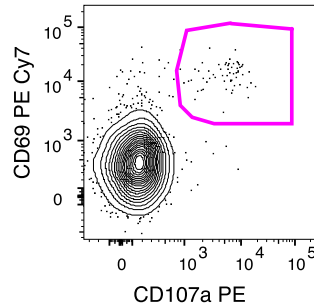

Supplement: ppat.1008015.s011.pdf [file ppat.1008015.s011.pdf]
